# Supplementary material
Source: PubMed Central journal article supplement (PMC2919969)
Supplement: 1001380107_pnas.201001380SI.pdf [file 1001380107_pnas.201001380SI.pdf]

# Supporting Information

## Casteleyn et al. 10.1073/pnas.1001380107

**DNA Extraction and Amplification of Microsatellite Loci.** Cells from a 50-mL growing batch culture were harvested by centrifugation and stored at  $-80^{\circ}\text{C}$ . Genomic DNA was extracted from pelleted cells using a DNeasy Plant Mini Kit (Qiagen) following the manufacturer's protocol. Six nuclear microsatellite loci (PP1, PP2, PP3, PP4, PP5, and PP6) were amplified in separate PCR reactions with fluorescently labeled primers (6FAM, VIC, NED; Applied Biosystems) following PCR conditions as described in Evans and Hayes (1) and modified as outlined in Casteleyn et al. (2). PCR products were analyzed on an ABI 3130xl genetic analyzer (Applied Biosystems) according to Casteleyn et al. (2). To reduce genotyping errors, positive and negative controls were used and scoring of alleles was performed by the same person. Genotypes were scored using Genemapper v4.0 software (Applied Biosystems).

**Analysis of Genetic Diversity: Methods.** Seven predefined populations were considered, based on the geographical area sampled: Belgium, Denmark, Ireland, Atlantic Canada, Pacific United States, Japan, and New Zealand. Previous studies (2, 3) showed that temporal variation does not exceed spatial variation for the *P. pungens* clade I. Therefore populations sampled in different seasons or years from the same geographic area were pooled. Possible scoring errors due to stuttering or large allele dropout were assessed using the program MICROCHECKER v2.2.3 (4). CONVERT v1.31 (5) was used to format the MLG data and to identify private alleles for each population. To identify matching MLGs, the Excel add-in MS TOOLS v3 (6) was used. Identical MLGs from the same sampling location and sampling date were removed from the dataset because isolations were not always done within 24 h after sampling. This is a potential problem because asexual (i.e., clonal) reproduction may take place between the time of field sampling and the moment of isolating the diatom cells, leading to a potential underestimation of diversity. Therefore, we did not estimate clonal diversities (number of unique genotypes relative to sample size) per population. GIMLET v1.3.3 (7) was used to calculate the probability of identity,  $P_{(\text{ID})}$ , and the probability of identity for siblings,  $P_{(\text{ID})\text{sib}}$ , for each locus and over all loci. Waits et al. (8) suggested that  $P_{(\text{ID})}$  or  $P_{(\text{ID})\text{sib}}$  values between 0.01 and 0.0001 indicate that the markers possess sufficient resolving power to distinguish unrelated individuals. Numbers of alleles, allele frequencies, number of genotypes, observed heterozygosity ( $H_o$ ), and expected heterozygosity ( $H_e$ ), were calculated per population for each locus using GENEPOP v4.0 (9). To compare the number of alleles between populations with different sample sizes, the software ARES v1.2.2 (10) was used. Unlike other tools based on rarefaction, ARES extrapolates beyond the sample size. Departures from HWE at each locus in every population were tested using an exact test (11) with a Markov chain method to estimate exact  $P$  values (dememorisation number: 10,000, 300 batches with 5,000 iterations per batch; to keep the SEs  $< 0.01$ ).  $F_{IS}$  was used as an indicator of heterozygote excess or deficit (12). Fisher's exact tests were performed to test across loci within each population. HWE tests were done in GENEPOP v4.0, which was also used for testing LD between all pairs of loci per population using exact tests as outlined above. Multiple test problems were dealt with by calculating corrected  $P$  values using the sequential Bonferroni technique (13).

**Analysis of Genetic Diversity: Results.** The number of alleles per locus across the seven populations ranged from 9 (locus PP5) to 39 (locus PP3). In total 118 alleles were recovered in 242 isolates. Results of the allelic richness analysis showed that Japan had the highest and the United States the lowest numbers of alleles

(Fig. 2). Private alleles (Table S2) in populations were nearly always due to single isolates. However, private alleles at PP3 and PP6 in Japan were found in two to four isolates. The same was true for private alleles at PP2, PP3, PP5, and PP6 in Canada. In New Zealand, private alleles at PP2, PP3, PP4, and PP6 were shared by multiple isolates with up to 17 isolates for PP4 and 39 isolates for PP6.

$H_o$  averaged over all loci for each population ranged from 0.55 (United States) to 0.75 (Japan) and was similar to  $H_e$  except in Japan, where lower  $H_o$  values were found (Table S2). Hence HWE tests revealed only significant deviations at PP3 and PP4 in the Japanese population, which could probably be attributed to the higher allelic richness at these loci compared with other populations. In the New Zealand population there was also a significant HWE deviation at PP1 (Table S2). There was no evidence that scoring errors due to large allele drop-out or stutter contributed to the observed HWE deviations. Exact tests for LD yielded eight significant values out of 105 pairwise tests (7.6%), six of them were found in the Japanese population (five of them involving PP3 and PP4). This suggests that LD is not a particularly important characteristic of this dataset.

**STRUCTURE Analysis: Methods.** The Bayesian clustering program STRUCTURE v2.2 (14) was used to infer population structure without predefined population subdivision. STRUCTURE divides sampled individuals into a number of clusters ( $K$ ) independent of locality information (i.e., based only on MLGs), so as to minimize deviations from Hardy-Weinberg and linkage equilibrium. Individuals are probabilistically assigned to one cluster or more than one cluster if they are genetically admixed. The most likely number of populations ( $K$ ) was estimated by performing 10 independent runs for each value of  $K$  from 2 to 10 with a burn-in and run length of 100,000 repetitions and using the model with correlated allele frequencies, noninformative priors and assuming admixture. The estimated "Ln Probability of Data [Ln P(D)]" given  $K$  was used as a criterion to select the most likely number of populations ( $K$ ) represented by our data by looking for either a maximum value or a plateau for increasing  $K$ . The lower value of  $K$  showing such behavior was considered as representative of the most appropriate clustering model (15). Using this criterion, the most likely number of populations was estimated to be  $K = 6$  (Fig. S2). For the selected  $K$  value, we evaluated the individual membership coefficient ( $q_{\text{ind}}$ ) to the inferred clusters. Individuals with a proportion of membership to each cluster  $q_{\text{ind}} < 0.90$  (admixed individual) were assigned to multiple clusters, whereas individuals with  $q_{\text{ind}} \geq 0.90$  were assigned to a single cluster. CLUMPP v1.1.1 (16) was used to line up the cluster labels across runs and to estimate the degree of congruence between independent runs, by calculating the Symmetric Similarity Coefficient (SSC) for pairs of runs at each  $K$  value, resulting in an average pairwise similarity measure named  $H$  (the nearer  $H$  is to one, the higher the degree of congruence between independent runs). The Fullsearch algorithm was used for  $K=2$  and  $K=3$  and the Greedy algorithm for greater values of  $K$  (testing a predefined number of random sequences: 100,000 for  $K=4$ ; 10,000 for  $K=5$  and 1,000 for  $K>6$ ).

**STRUCTURE Analysis: Results.** Using the six-cluster model (Fig. S2), we found three clusters that showed little admixing and three clusters with higher levels of admixing (Fig. 3). Isolates from the Pacific United States, Japan, and New Zealand could be readily assigned to the clusters corresponding to their geographic origin except in a few rare cases. The North Atlantic clusters showed





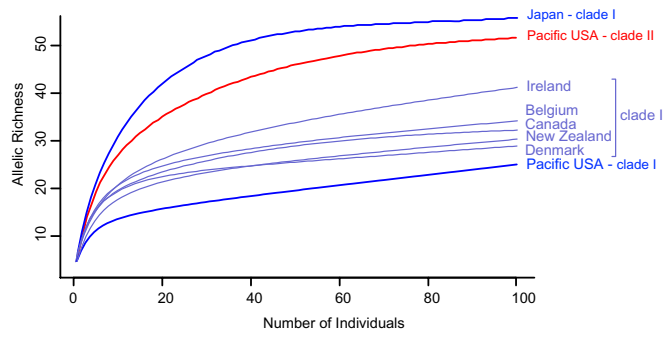

**Fig. S3.** Comparison of allelic richness between predefined populations of *P. pungens* clade II (northeastern Pacific) (red line), and clade I from both sides of the northern Pacific (dark blue lines) and other regions (light blue lines). Allelic richness was inferred from multilocus genotypes [four microsatellite loci analyzed by Adams et al. (1): PP2, PP3, PP5, PP6], and extrapolated beyond the sample sizes using ARES (2). No microsatellite data are yet available for *P. pungens* clade III populations.

1. Adams NG, et al. (2009) Genetic population structure of *Pseudo-nitzschia pungens* (Bacillariophyceae) from the Pacific Northwest and the North Sea. *J Phycol* 45:1037–1045.
2. Van Loon EE, Cleary DFR, Fauvelot C (2007) ARES: Software to compare allelic richness between uneven samples. *Mol Ecol Notes* 7:579–582.

**Table S1. Isolates of *Pseudo-nitzschia pungens* clade I used in this study**

| Water basin                  | Predefined population | Sampling location              | Latitude  | Longitude | Sampling date | Isolated by                   | GenBank accession number |                               | n  | n <sub>tot</sub> |
|------------------------------|-----------------------|--------------------------------|-----------|-----------|---------------|-------------------------------|--------------------------|-------------------------------|----|------------------|
|                              |                       |                                |           |           |               |                               | ITS                      | rbCL                          |    |                  |
| <b>Atlantic Ocean</b>        |                       |                                |           |           |               |                               |                          |                               |    |                  |
| North Sea                    | Belgium               | VLIZ 120                       | 51.185°   | 2.701°    | 4 May 2007    | V. Chepurnov                  | FN823050                 |                               | 50 | 50               |
| Limfjord                     | Denmark               |                                | 56.8629°  | 8.94292°  | Aug-Sep 1997  | N. Lundholm                   | FN823051                 | same as FM207548 <sup>†</sup> | 20 | 20               |
| Irish Sea                    | Ireland               | Belfast Harbor, HAB6           | 54.738°   | -5.653°   | 7 July 2007   | G. Casteleyn                  |                          |                               | 29 |                  |
|                              |                       | Belfast Harbor, HAB7           | 54.728°   | -5.68°    | 7 July 2007   | G. Casteleyn                  |                          |                               | 20 |                  |
|                              |                       | Belfast Harbor, HAB8           | 54.713°   | -5.723°   | 7 July 2007   | G. Casteleyn                  |                          | same as FM207548 <sup>†</sup> | 3  | 52               |
| <b>Northwestern Atlantic</b> | Canada                | Cardigan River, PEI            | 46.2231°  | -62.5708° | Sep 2002      | C. Léger                      | AM778786                 |                               | 1  |                  |
|                              |                       | Miramichi Bay, NB              | 47.1153°  | -65.1659° | Sep-Oct 2002  | C. Léger                      | AM778787                 |                               | 3  |                  |
|                              |                       | Bay of Fundy, NB               | 44.9944°  | -65.7945° | Oct 2002      | C. Léger                      | AM778788                 |                               | 1  |                  |
|                              |                       | Miramichi Bay, NB              | 47.1153°  | -65.1659° | Sep 2003      | C. Léger                      | AM778789                 |                               | 2  |                  |
|                              |                       | Malpeque Bay, PEI              | 46.533°   | -63.8°    | Oct 2003      | C. Léger                      | AM778790                 |                               | 2  |                  |
|                              |                       | Brudenell River, PEI           | 46.2232°  | -63.4842° | Sep 2004      | C. Léger                      | AM778791                 |                               | 2  |                  |
|                              |                       | Cardigan River, PEI            | 46.2231°  | -62.5708° | Sep 2004      | C. Léger                      | AM778792                 |                               | 2  |                  |
|                              |                       | Boughton Bay, PEI              | 46.1656°  | -62.4769° | Sep 2004      | C. Léger                      | AM778794                 | same as FM207548 <sup>†</sup> | 2  |                  |
|                              |                       | Boughton Bay, PEI              | 46.1656°  | -62.4769° | Sep 2005      | C. Léger                      |                          |                               | 3  |                  |
|                              |                       | Malpeque Bay, PEI              | 46.533°   | -63.8°    | Nov 2005      | C. Léger                      |                          |                               | 2  |                  |
|                              |                       | New London Bay, PEI            | 46.4906°  | -63.4601° | Nov 2005      | I. Sahraoui                   |                          | same as FM207548 <sup>†</sup> | 1  |                  |
| Miramichi Bay, NB            | 47.1153°              | -65.1659°                      | Sep 2007  | C. Léger  |               | same as FM207548 <sup>†</sup> | 5                        | 26                            |    |                  |
| <b>Pacific Ocean</b>         |                       |                                |           |           |               |                               |                          |                               |    |                  |
| <b>Northeastern Pacific</b>  | United States         | B5                             | 48.148°   | -125.248° | Oct 2004      | N. Adams                      | FM207591                 | same as FM207548 <sup>†</sup> | 3  |                  |
|                              |                       | E3                             | 48.2°     | -125.883° | Sep 2005      | N. Adams                      | same as FM207591*        | same as FM207548 <sup>†</sup> | 5  |                  |
|                              |                       | E1                             | 48.039°   | -125.616° | Sep 2005      | N. Adams                      | same as FM207591*        | same as FM207548 <sup>†</sup> | 5  |                  |
|                              |                       | E2                             | 48.131°   | -125.72°  | Sep 2005      | N. Adams                      | same as FM207591*        | FM207548                      | 6  |                  |
|                              |                       | E4                             | 48.074°   | -126.141° | Sep 2005      | N. Adams                      | same as FM207591*        | same as FM207548 <sup>†</sup> | 8  | 27               |
| <b>Northwestern Pacific</b>  | Japan                 | Ofunato Bay                    | 39.0617°  | 141.732°  | 7 Aug 2000    | Y. Kotaki                     | AM778812                 | same as FM207548 <sup>†</sup> | 1  |                  |
|                              |                       |                                |           |           | 25 Jun 2001   | Y. Kotaki                     | AM778813                 |                               | 1  |                  |
|                              |                       |                                |           |           | 3 Dec 2001    | Y. Kotaki                     | AM778814                 |                               | 1  |                  |
|                              |                       |                                |           |           | 13 Nov 2006   | Y. Kotaki                     |                          | same as FM207548 <sup>†</sup> | 21 | 24               |
| <b>Southwestern Pacific</b>  | New Zealand           | Steels Reef, North Island      | -37.9442° | 177.058°  | Oct 2000      | L. Rhodes                     | AM778815                 |                               | 1  |                  |
|                              |                       | Big Glory Bay, Stewart Island  | -46.9824° | 168.1°    | Feb 2003      | L. Rhodes                     | AM778816                 |                               | 1  |                  |
|                              |                       | Taylor's Mistake, South Island | -43.5788° | 172.79°   | Aug 2004      | L. Rhodes                     | AM778817                 | same as FM207548 <sup>†</sup> | 1  |                  |
|                              |                       | Collingwood, South Island      | -40.686°  | 172.69°   | Oct 2004      | L. Rhodes                     |                          |                               | 1  |                  |



**Table S2.** Number of *Pseudo-nitzschia pungens* clade I isolates genotyped ( $n$ ), size ranges of the alleles (bp), number of alleles ( $N_A$ ), number of private alleles ( $N_{priv}$ ), number of unique genotypes observed ( $G_o$ ), observed ( $H_o$ ) and expected ( $H_e$ ) heterozygosity,  $F_{IS}$  according to Weir and Cockerham (1) and probabilities of identity ( $P_{(ID)}$ ) and  $P_{(ID)sib}$ ) across loci for every population and overall populations

| locus         | Populations |         |         |         |               |         |             | Total   |
|---------------|-------------|---------|---------|---------|---------------|---------|-------------|---------|
|               | Belgium     | Denmark | Ireland | Canada  | United States | Japan   | New Zealand |         |
| <b>PP1</b>    |             |         |         |         |               |         |             |         |
| $n$           | 50          | 20      | 52      | 26      | 27            | 24      | 43          | 242     |
| bp            | 217–246     | 217–246 | 217–246 | 217–246 | 225–246       | 217–250 | 227–248     | 217–250 |
| $N_A$         | 9           | 9       | 10      | 7       | 6             | 12      | 9           | 15      |
| $N_{priv}$    | 0           | 0       | 0       | 0       | 0             | 2       | 1           |         |
| $G_o$         | 17          | 12      | 25      | 12      | 9             | 15      | 15          |         |
| $H_o$         | 0.76        | 1.00    | 0.81    | 0.77    | 0.78          | 0.75    | 0.63        |         |
| $H_e$         | 0.78        | 0.84    | 0.81    | 0.81    | 0.70          | 0.84    | 0.70        |         |
| $F_{IS}$      | 0.03        | -0.18   | 0.01    | 0.05    | -0.12         | 0.11    | 0.11        |         |
| <b>PP2</b>    |             |         |         |         |               |         |             |         |
| $n$           | 50          | 20      | 52      | 26      | 27            | 24      | 43          | 242     |
| bp            | 166–240     | 168–240 | 168–240 | 175–233 | 166–190       | 168–190 | 168–233     | 166–240 |
| $N_A$         | 9           | 5       | 6       | 4       | 4             | 5       | 7           | 13      |
| $N_{priv}$    | 2           | 0       | 0       | 1       | 0             | 0       | 1           | n/a     |
| $G_o$         | 13          | 6       | 9       | 6       | 5             | 8       | 11          | 28      |
| $H_o$         | 0.70        | 0.65    | 0.52    | 0.50    | 0.74          | 0.67    | 0.81        |         |
| $H_e$         | 0.68        | 0.62    | 0.56    | 0.49    | 0.58          | 0.68    | 0.71        |         |
| $F_{IS}$      | -0.03       | -0.04   | 0.07    | -0.02   | -0.28         | 0.01    | -0.14       |         |
| <b>PP3</b>    |             |         |         |         |               |         |             |         |
| $n$           | 50          | 20      | 52      | 26      | 27            | 24      | 43          | 242     |
| bp            | 191–254     | 191–246 | 191–262 | 212–254 | 196–236       | 197–257 | 205–244     | 191–262 |
| $N_A$         | 12          | 9       | 15      | 9       | 7             | 26      | 8           | 39      |
| $N_{priv}$    | 1           | 0       | 2       | 1       | 2             | 11      | 2           | n/a     |
| $G_o$         | 30          | 15      | 36      | 12      | 13            | 21      | 9           | 97      |
| $H_o$         | 0.86        | 0.75    | 0.92    | 0.96    | 0.63          | 0.83    | 0.81        |         |
| $H_e$         | 0.87        | 0.87    | 0.89    | 0.81    | 0.79          | 0.97    | 0.69        |         |
| $F_{IS}$      | 0.02        | 0.14    | -0.04   | -0.19   | 0.20          | 0.14    | -0.19       |         |
| $P_{(ID)}$    |             |         |         |         |               |         |             |         |
| $P_{(ID)sib}$ |             |         |         |         |               |         |             |         |
| <b>PP4</b>    |             |         |         |         |               |         |             |         |
| $n$           | 50          | 20      | 52      | 25      | 27            | 24      | 43          | 241     |
| bp            | 133–203     | 133–203 | 133–209 | 133–205 | 133–205       | 133–218 | 155–216     | 133–218 |
| $N_A$         | 10          | 9       | 16      | 10      | 3             | 18      | 13          | 29      |
| $N_{priv}$    | 0           | 0       | 0       | 2       | 0             | 5       | 3           | n/a     |
| $G_o$         | 26          | 15      | 28      | 17      | 4             | 17      | 26          | 93      |
| $H_o$         | 0.74        | 0.80    | 0.92    | 0.80    | 0.63          | 0.71    | 0.86        |         |
| $H_e$         | 0.84        | 0.86    | 0.88    | 0.87    | 0.51          | 0.93    | 0.87        |         |
| $F_{IS}$      | 0.12        | 0.07    | -0.05   | 0.08    | -0.23         | 0.23    | 0.01        |         |
| <b>PP5</b>    |             |         |         |         |               |         |             |         |
| $n$           | 50          | 20      | 52      | 26      | 27            | 24      | 43          | 242     |
| bp            | 186–198     | 186–198 | 186–202 | 186–200 | 192–198       | 188–202 | 192–198     | 186–202 |
| $N_A$         | 5           | 6       | 7       | 6       | 3             | 7       | 4           | 9       |
| $N_{priv}$    | 0           | 0       | 0       | 1       | 0             | 0       | 0           | n/a     |
| $G_o$         | 9           | 10      | 10      | 8       | 5             | 10      | 7           | 21      |
| $H_o$         | 0.60        | 0.55    | 0.42    | 0.62    | 0.48          | 0.83    | 0.40        |         |
| $H_e$         | 0.60        | 0.62    | 0.48    | 0.61    | 0.54          | 0.74    | 0.56        |         |
| $F_{IS}$      | 0.01        | 0.11    | 0.11    | -0.01   | 0.11          | -0.13   | 0.30        |         |
| <b>PP6</b>    |             |         |         |         |               |         |             |         |
| $n$           | 50          | 20      | 52      | 26      | 27            | 24      | 43          | 242     |
| bp            | 195–236     | 195–236 | 195–236 | 191–218 | 191–258       | 191–262 | 191–216     | 191–262 |
| $N_A$         | 3           | 3       | 7       | 5       | 2             | 7       | 5           | 13      |
| $N_{priv}$    | 0           | 0       | 0       | 1       | 1             | 1       | 1           | n/a     |
| $G_o$         | 6           | 6       | 10      | 7       | 2             | 14      | 8           | 35      |
| $H_o$         | 0.54        | 0.70    | 0.58    | 0.65    | 0.04          | 0.71    | 0.74        |         |
| $H_e$         | 0.57        | 0.65    | 0.69    | 0.60    | 0.04          | 0.83    | 0.63        |         |
| $F_{IS}$      | 0.06        | -0.08   | 0.16    | -0.09   | 0.00          | 0.14    | -0.18       |         |

Table S2. Cont.

| locus                | Populations |          |          |          |               |             |              | Total    |
|----------------------|-------------|----------|----------|----------|---------------|-------------|--------------|----------|
|                      | Belgium     | Denmark  | Ireland  | Canada   | United States | Japan       | New Zealand  |          |
| <b>Across loci</b>   |             |          |          |          |               |             |              |          |
| n                    | 50          | 20       | 52       | 26       | 27            | 24          | 43           | 242      |
| N <sub>A</sub> *     | 8.0         | 6.8      | 10.2     | 6.8      | 4.2           | 12.5        | 7.7          | 19.7     |
| H <sub>o</sub>       | 0.70        | 0.74     | 0.70     | 0.72     | 0.55          | 0.75        | 0.71         |          |
| H <sub>e</sub>       | 0.72        | 0.75     | 0.72     | 0.70     | 0.53          | 0.83        | 0.69         |          |
| F <sub>IS</sub>      | 0.03        | 0.00     | 0.03     | -0.03    | -0.04         | <b>0.10</b> | <b>-0.02</b> |          |
| P <sub>(ID)</sub>    | 4.70E-07    | 8.48E-08 | 2.01E-07 | 6.04E-07 | 1.67E-04      | 5.57E-12    | 1.79E-06     | 3.75E-09 |
| P <sub>(ID)sib</sub> | 5.26E-03    | 4.87E-03 | 5.24E-03 | 6.95E-03 | 2.87E-02      | 2.07E-03    | 7.21E-03     | 1.95E-03 |

In bold: significant deviation from HWE (after sequential Bonferroni correction). Totals per locus, where appropriate are shown in the last column.

\*Average number of alleles across the six loci.

1. Weir BS, Cockerham CC (1984) Estimating F-statistics for the analysis of population structure. *Evolution* 38:1358–1370.

**Table S3. Representatives of *Pseudo-nitzschia* clade I [as presented in Lundholm et al. (1)] used in the phylogenetic analysis with indication of GenBank numbers**

|                                       | <i>rbcl</i> | LSU rDNA | rDNA ITS |
|---------------------------------------|-------------|----------|----------|
| <i>P. multistriata</i> CM2            | EF423505    | AF416753 | DQ990368 |
| <i>P. multistriata</i> KoreaA         |             |          | AY257843 |
| <i>P. multistriata</i> CM1            |             |          | DQ990367 |
| <i>P. americana</i>                   | EF423504    | U41390   | EU523099 |
| <i>P. seriata</i> f. <i>obtusa</i> T5 |             |          | DQ062667 |
| <i>P. seriata</i> Lynaes8             |             | AF417653 | DQ062666 |
| <i>P. seriata</i> Nissum3             |             |          | AY257841 |
| <i>P. australis</i> PLYSt54B          |             | AF417651 | AY452528 |
| <i>P. australis</i> au43              |             |          | DQ062661 |
| <i>P. multiseriata</i> PM02           |             | AF440772 | EU302796 |
| <i>P. multiseriata</i> OFPm984        |             |          | DQ062664 |
| <i>P. pungens</i> (clade III) P24     | EF423506    | AF417650 | AY257845 |
| <i>P. pungens</i> (clade III) Mex18   |             |          | AY257846 |
| <i>P. pungens</i> (clade III) Viet    |             |          | DQ166533 |
| <i>P. pungens</i> (clade III) KBH2    |             |          | DQ062665 |
| <i>P. pungens</i> (clade II) US115    | FM207547    | AF440775 | AM778804 |
| <i>P. pungens</i> (clade II) US135    |             |          | AM778811 |
| <i>P. pungens</i> (clade I) V120      |             |          | AM778747 |
| <i>P. pungens</i> (clade I) Cn172     | FM207548    | EF642979 | AM778786 |

1. Lundholm N, et al. (2006) Inter- and intraspecific variation of the *Pseudo-nitzschia delicatissima* complex (Bacillariophyceae) illustrated by rRNA probes, morphological data and phylogenetic analyses. *J Phycol* 42:464–481.
